# Supplementary material for: Antibiotic-Resistant Neisseria gonorrhoeae Spread Faster with More Treatment, Not More Sexual Partners
Source: PubMed Central journal article supplement (PMC4872991; doi:10.1371/journal.ppat.1005611), 2016-05-19
Supplement: ppat.1005611.s001.pdf [file ppat.1005611.s001.pdf]

**S1 Table. Digitized data from the Gonococcal Resistance to Antimicrobials Surveillance Programme (GRASP).**  
Data for heterosexual men (HetM) and men who have sex with men (MSM).

| Year | Resistance | Programme | Population | Drug          |
|------|------------|-----------|------------|---------------|
| 2004 | 0.00       | GRASP     | HetM       | Cefixime      |
| 2005 | 0.00       | GRASP     | HetM       | Cefixime      |
| 2006 | 0.00       | GRASP     | HetM       | Cefixime      |
| 2007 | 0.41       | GRASP     | HetM       | Cefixime      |
| 2008 | 1.42       | GRASP     | HetM       | Cefixime      |
| 2009 | 2.23       | GRASP     | HetM       | Cefixime      |
| 2010 | 5.69       | GRASP     | HetM       | Cefixime      |
| 2004 | 0.00       | GRASP     | MSM        | Cefixime      |
| 2005 | 0.00       | GRASP     | MSM        | Cefixime      |
| 2006 | 0.20       | GRASP     | MSM        | Cefixime      |
| 2007 | 2.94       | GRASP     | MSM        | Cefixime      |
| 2008 | 5.18       | GRASP     | MSM        | Cefixime      |
| 2009 | 24.06      | GRASP     | MSM        | Cefixime      |
| 2010 | 33.40      | GRASP     | MSM        | Cefixime      |
| 2000 | 3.06       | GRASP     | HetM       | Ciprofloxacin |
| 2001 | 4.59       | GRASP     | HetM       | Ciprofloxacin |
| 2002 | 12.13      | GRASP     | HetM       | Ciprofloxacin |
| 2003 | 10.80      | GRASP     | HetM       | Ciprofloxacin |
| 2004 | 10.21      | GRASP     | HetM       | Ciprofloxacin |
| 2005 | 11.10      | GRASP     | HetM       | Ciprofloxacin |
| 2006 | 18.49      | GRASP     | HetM       | Ciprofloxacin |
| 2007 | 21.11      | GRASP     | HetM       | Ciprofloxacin |
| 2008 | 24.66      | GRASP     | HetM       | Ciprofloxacin |
| 2009 | 28.49      | GRASP     | HetM       | Ciprofloxacin |
| 2000 | 0.76       | GRASP     | MSM        | Ciprofloxacin |
| 2001 | 2.01       | GRASP     | MSM        | Ciprofloxacin |
| 2002 | 8.50       | GRASP     | MSM        | Ciprofloxacin |
| 2003 | 10.61      | GRASP     | MSM        | Ciprofloxacin |
| 2004 | 26.27      | GRASP     | MSM        | Ciprofloxacin |
| 2005 | 42.52      | GRASP     | MSM        | Ciprofloxacin |
| 2006 | 43.13      | GRASP     | MSM        | Ciprofloxacin |
| 2007 | 47.41      | GRASP     | MSM        | Ciprofloxacin |
| 2008 | 45.83      | GRASP     | MSM        | Ciprofloxacin |
| 2009 | 53.88      | GRASP     | MSM        | Ciprofloxacin |
