# Supplementary material for: Antibiotic-Resistant Neisseria gonorrhoeae Spread Faster with More Treatment, Not More Sexual Partners
Source: PubMed Central journal article supplement (PMC4872991; doi:10.1371/journal.ppat.1005611), 2016-05-19
Supplement: ppat.1005611.s002.pdf [file ppat.1005611.s002.pdf]

**S2 Table. Digitized data from the Gonococcal Isolate Surveillance Project (GISP).** Data for men who have sex with women (MSW) and men who have sex with men (MSM). We used the MSW data as heterosexual men (HetM) data.

| <b>Year</b> | <b>Resistance</b> | <b>Programme</b> | <b>Population</b> | <b>Drug</b>   |
|-------------|-------------------|------------------|-------------------|---------------|
| 1995        | 0.35              | GISP             | MSW               | Ciprofloxacin |
| 1996        | 0.18              | GISP             | MSW               | Ciprofloxacin |
| 1997        | 0.27              | GISP             | MSW               | Ciprofloxacin |
| 1998        | 0.24              | GISP             | MSW               | Ciprofloxacin |
| 1999        | 0.50              | GISP             | MSW               | Ciprofloxacin |
| 2000        | 0.41              | GISP             | MSW               | Ciprofloxacin |
| 2001        | 0.56              | GISP             | MSW               | Ciprofloxacin |
| 2002        | 1.00              | GISP             | MSW               | Ciprofloxacin |
| 2003        | 1.59              | GISP             | MSW               | Ciprofloxacin |
| 2004        | 2.86              | GISP             | MSW               | Ciprofloxacin |
| 2005        | 3.86              | GISP             | MSW               | Ciprofloxacin |
| 2006        | 7.04              | GISP             | MSW               | Ciprofloxacin |
| 1995        | 0.09              | GISP             | MSM               | Ciprofloxacin |
| 1996        | 0.06              | GISP             | MSM               | Ciprofloxacin |
| 1997        | 0.41              | GISP             | MSM               | Ciprofloxacin |
| 1998        | 0.03              | GISP             | MSM               | Ciprofloxacin |
| 1999        | 0.47              | GISP             | MSM               | Ciprofloxacin |
| 2000        | 0.62              | GISP             | MSM               | Ciprofloxacin |
| 2001        | 1.65              | GISP             | MSM               | Ciprofloxacin |
| 2002        | 7.31              | GISP             | MSM               | Ciprofloxacin |
| 2003        | 15.09             | GISP             | MSM               | Ciprofloxacin |
| 2004        | 23.92             | GISP             | MSM               | Ciprofloxacin |
| 2005        | 29.11             | GISP             | MSM               | Ciprofloxacin |
| 2006        | 39.13             | GISP             | MSM               | Ciprofloxacin |
