# Supplementary material for: Antibiotic-Resistant Neisseria gonorrhoeae Spread Faster with More Treatment, Not More Sexual Partners
Source: PubMed Central journal article supplement (PMC4872991; doi:10.1371/journal.ppat.1005611), 2016-05-19
Supplement: ppat.1005611.s003.pdf [file ppat.1005611.s003.pdf]

**S3 Table. Prevalence and incidence of diagnosed and treated infections after model calibration.**

| <b>Measure</b>                                         | <b>Population</b> | <b>sexual activity</b> | <b>Median</b> | <b>IQR</b>  |
|--------------------------------------------------------|-------------------|------------------------|---------------|-------------|
| Prevalence (in %)                                      | HMW               | low                    | 0.12          | 0.09-0.15   |
| Prevalence (in %)                                      | HMW               | high                   | 2.13          | 1.74-2.64   |
| Prevalence (in %)                                      | HMW               | either                 | 0.25          | 0.20-0.31   |
| Incidence (in % person <sup>-1</sup> y <sup>-1</sup> ) | HMW               | low                    | 0.04          | 0.02-0.06   |
| Incidence (in % person <sup>-1</sup> y <sup>-1</sup> ) | HMW               | high                   | 2.85          | 2.16-3.74   |
| Incidence (in % person <sup>-1</sup> y <sup>-1</sup> ) | HMW               | either                 | 0.23          | 0.17-0.29   |
| Prevalence (in %)                                      | MSM               | low                    | 0.58          | 0.41-0.79   |
| Prevalence (in %)                                      | MSM               | high                   | 27.41         | 22.88-32.08 |
| Prevalence (in %)                                      | MSM               | either                 | 2.07          | 1.67-2.44   |
| Incidence (in % person <sup>-1</sup> y <sup>-1</sup> ) | MSM               | low                    | 1.02          | 0.54-1.5    |
| Incidence (in % person <sup>-1</sup> y <sup>-1</sup> ) | MSM               | high                   | 104.52        | 95.65-113.4 |
| Incidence (in % person <sup>-1</sup> y <sup>-1</sup> ) | MSM               | either                 | 6.49          | 6.18-6.83   |
